# Supplementary material for: Does exercise improve healing of diabetic foot ulcers? A systematic review
Source: J Foot Ankle Res. 2021 Mar 20;14:19. doi: 10.1186/s13047-021-00456-w (PMC7980337; doi:10.1186/s13047-021-00456-w)
Supplement: Supplementary file 2 — Additional file 2: Appendix 2 [file 13047_2021_456_MOESM2_ESM.xlsx]

## Sheet: Data Extract
Author	Article Title	Journal	Country of Origin	Aim of the Study	Design/Type of Study	Population	Setting (eg. Outpatient vs Home)	Details of randomisation	Description of Exercise Intervention	Frequency or Intensity of Intervention	Description of Control	Duration of Intervention	Delivery Mode of Intervention	Characteristics of Participants (Age, Gender, Co-Morbidities)	Characteristics of control group (age, gender, co-morbidities)	Number of participants (baseline)	Number of controls (baseline)	Attrition participants final follow up	Attrition controls final follow up	Details of withdrawals (participants)	Details of withdrawals (controls)	Measurements Taken at Baseline	Measurements Taken After 2 Weeks	Measurements Take After 4 Weeks	Measurements Taken After 6 Weeks	Measurements Taken After 8 Weeks	Measurements Taken After 10 Weeks	Final Measurements	Validation of measurement tool?	Summary outcome data	Statistical technique used	Type of analysis used (eg. intention to treat)	Results of Study Analysis (Your Findings of Study Analysis)	Adverse events	PEDro score	Comments

## Sheet: Summary Input 
Journal	Participants (n)	Control (n)	Intervention	Baseline Measurement	Measurement After 4 Weeks	Measurements After 8 Weeks	Measurement After 12 Weeks	Comment
Eraydin, S Avsar, Gulcin	30	30	Patients taught foot exercises over 20-30mins in clinical setting by researcher. Provided with pictures of exercise intervention to support education	Distrubution of DFU Area Averages (cm2): Beginning: 24.67 (Control) SD 20.70; 12.63 (Study) SD 14.43 Distribution of DFU Total Depth (cm3): Beginning: 0.61 (Control) SD 0.84; 0.56 (Study) SD 0.85	Distrubution of DFU Area Averages (cm2): 4th Week: 24.75 (Control) SD 20.84; 6.91 (Study) SD 5.44 Distribution of DFU Total Depth (cm3): 4th Week: 0.82 (Control) SD 1.07; 0.42 (Study) SD 0.68	Distrubution of DFU Area Averages (cm2): 8th Week: 20.33 (Control) SD 20.79; 4.30 (Study) SD 4.30 Distribution of DFU Total Depth (cm3): 8th Week: 0.83 (Control) SD 1.21; 0.36 (Study) SD 0.50	Distrubution of DFU Area Averages (cm2): 12th Week: 18.52 (Control) SD 21.49; 3.29 (Study) SD 3.80 Distribution of DFU Total Depth (cm3): 12th Week: 0.80 (Control) SD 1.26; 0.28 (Study) SD 0.38
Flahr, D	9	8	Non-weight-bearing foot exercises, included simple ankle in-version, eversion, flexion, and extension were prescribed - 4 in total.	Wound Measurement Data (Measured in cm2): C1 = 0.63; E1 = 1.84 C2 = 0.43; E2 = 6.22 C3 = 1.26; E3 = 0.27 C4 = 0.25; E4 = 0.16 C5 = 6.03; E5 = 0.16 C6 = 0.14; E6 = 0.09 C7 = 0.16; E7 = 0.16 C8 = 10.2; E8 = 0.27 C9 = 1.32; E9 = 0.31 C10 = / ; E10 = 1.01	Wound Measurement Data (Measured in cm2): C1 = 0.79; E1 = 1.26 C2 = 0.75; E2 = 2.53 C3 = 0.39; E3 = 0.33 C4 = 0.19; E4 = 0.05 C5 = 5.42; E5 = 0.22 C6 = 0.07; E6 = 0.13 C7 = Withdrew; E7 = 0.06 C8 = Not seen; E8 = 0.24 C9 = 0.71; E9 = 0.31 C10 = / ; E10 = 5.89	Wound Measurement Data (Measured in cm2): C1 = 0.38; E1 = 0.38 C2 = 0.59; E2 = Withdrew (TCC) C3 = 0.16; E3 = 0.24 C4 = 0.05; E4 = 0.07 C5 = 8.10; E5 = 0.27 C6 = Closed; E6 = Closed C7 = /; E7 = 1.32 C8 = 0.42; E8 = 0.31 C9 = Not Seen; E9 = Closed C10 = / ; E10 = 3.06	C1 = 0.79 (+25%); E1 = 0.22 (-88%) C2 = 0.49 (+14%); E2 = / (-59%) C3 = 0.14 (-88%%); E3 = 0.09 (-67%) C4 = Closed (-100%); E4 = Closed (-100%) C5 = 9.18 (+2%); E5 = 0.12 (-25%) C6 = Closed (-100%); E6 = Closed (-100%) C7 = /; E7 = 0.05 (-69%) C8 = Closed (-100%); E8 = 0.09 (-67%) C9 = 0.06 (-95%); E9 = Closed (-100%) C10 = / ; E10 = 2.36 (-131%)	Did not measure depth of wounds. Unable to obtain SD from raw data - Author not responding. Did not calculate DFU averages
Nwankwo MJ, Okoye GC, Egwuonwu AV, and Ezeukwu AO	31	30	Exercise under supervision throughout the study, rode on a bicycle ergo meter with foot interaction kept constant with standard gym pedal and specialised offloading insole padding to relieve pressure on the ulcer.	Baseline Wound Size Area: 16.17 +/- 7.15 SD (C); 21.23 +/- 8.05 SD (S)	Baseline Wound Size Area: 15.17 +/- 6.57 SD (C); 13.94 +/- 6.59 SD (S)	Baseline Wound Size Area: 11.80 +/- 5.38 SD (C); 6.10 +/- 5.95 SD (S)	Baseline Wound Size Area: 7.93 +/- 4.08 SD (C); 1.97 +/- 4.17 SD (S)	Intervention unlike 1 and 2, cannot perform meta-analysis with this
