# Supplementary material for: Does exercise improve healing of diabetic foot ulcers? A systematic review
Source: J Foot Ankle Res. 2021 Mar 20;14:19. doi: 10.1186/s13047-021-00456-w (PMC7980337; doi:10.1186/s13047-021-00456-w)
Supplement: Supplementary file 3 — Additional file 3: Appendix 3 [file 13047_2021_456_MOESM3_ESM.xlsx]

## Sheet: Data Extract
Date of Data Extraction	ID Number	Author	Article Title	Journal	Year/Volume/ Pages	Country of Origin	Institutional Affiliation and Contact	Aim of the Study	Design/Type of Study	Population	Setting (eg. Outpatient vs Home)	Description of Exercise Intervention	Frequency or Intensity of Intervention	Description of Control	Duration of Intervention	Delivery Mode of Intervention	Characteristics of Participants (Age, Gender, Co-Morbidities)	Characteristics of control group (age, gender, co-morbidities)	Number of participants (baseline)	Number of controls (baseline)	Attrition participants final follow up	Attrition controls final follow up	Details of withdrawals (participants)	Details of withdrawals (controls)	Details of randomisation	Measurements Taken at Baseline	Measurements Taken After 2 Weeks	Measurements Take After 4 Weeks	Measurements Taken After 6 Weeks	Measurements Taken After 8 Weeks	Measurements Taken After 10 Weeks	Final Measurements	Validation of measurement tool?	Summary outcome data	Statistical technique used	Type of analysis used (eg. intention to treat)	Results of Study Analysis (Your Findings of Study Analysis)	Adverse events	PEDro score	Comments
21/10/2019	1	Flahr, D	The Effect of Nonweight-bearing Exercise and Protocol Adherence on Diabetic Foot Ulcer Healing: A Pilot Study	Ostomy Wound Management	2010/56/40-50	Canada	University of Saskatchewan	Evaluate the potential influence of nonweight-bearing ankle exercises, and adherence to same, on the size of neuropathic, diabetic foot wounds in community-dwelling older adults.	Quasi-Experimental, prospective RCT	Patients who have DFU and referred to podiatry service in Saskatoon health region	Home	Non-weight-bearing foot exercises, included simple ankle in-version, eversion, flexion, and extension were prescribed - 4 in total.	10 times each, twice daily	Usual/routine care	12 weeks	Participants received a sheet describing a selection of exercises with explanations. Participants had to demonstrate exercises prior to leaving the clinic. Participants to record exercise activity in log.	Age: Range - 49-74 Mean - 61.9 Median - 60 SD - 8.117 Gender: Male - 8 Female - 2 Co-Morbidities: Yes - 6 No - 4 Alternate Therapies: Yes - 2 No - 8 Dartmouth Scores: Range - 13-24 Mean - 17.2 Median - 16 LEAP Scores: 20% - 1 80% - 1 90% - 2 100% - 6	Age: Range - 54-94 Mean - 74.25 Median - 74.5 SD - 16.255 Gender: Male - 4 Female - 4 Co-Morbidities: Yes - 3 No - 5 Alternate Therapies: Yes - 0 No - 8 Dartmouth Scores: Range - 12-24 Mean - 18.5 Median - 19 LEAP Scores: 20% - 0 80% - 3 90% - 1 100% - 4	10	9	9	8	1 entered TCC at week 8	1 withdrew, not stated	Numbered envelopes starting with the experimental arm and alternating with the control	Wound Measurement Data (Measured in cm2): C1 = 0.63; E1 = 1.84 C2 = 0.43; E2 = 6.22 C3 = 1.26; E3 = 0.27 C4 = 0.25; E4 = 0.16 C5 = 6.03; E5 = 0.16 C6 = 0.14; E6 = 0.09 C7 = 0.16; E7 = 0.16 C8 = 10.2; E8 = 0.27 C9 = 1.32; E9 = 0.31 C10 = / ; E10 = 1.01	Not Measured	Wound Measurement Data (Measured in cm2): C1 = 0.79; E1 = 1.26 C2 = 0.75; E2 = 2.53 C3 = 0.39; E3 = 0.33 C4 = 0.19; E4 = 0.05 C5 = 5.42; E5 = 0.22 C6 = 0.07; E6 = 0.13 C7 = Withdrew; E7 = 0.06 C8 = Not seen; E8 = 0.24 C9 = 0.71; E9 = 0.31 C10 = / ; E10 = 5.89	Not Measured	Wound Measurement Data (Measured in cm2): C1 = 0.38; E1 = 0.38 C2 = 0.59; E2 = Withdrew (TCC) C3 = 0.16; E3 = 0.24 C4 = 0.05; E4 = 0.07 C5 = 8.10; E5 = 0.27 C6 = Closed; E6 = Closed C7 = /; E7 = 1.32 C8 = 0.42; E8 = 0.31 C9 = Not Seen; E9 = Closed C10 = / ; E10 = 3.06	Not Measured	Wound Measurement Data (Measured in cm2) & Percentage Size Increase/Decrease: C1 = 0.79 (+25%); E1 = 0.22 (-88%) C2 = 0.49 (+14%); E2 = / (-59%) C3 = 0.14 (-88%); E3 = 0.09 (-67%) C4 = Closed (-100%); E4 = Closed (-100%) C5 = 9.18 (+2%); E5 = 0.12 (-25%) C6 = Closed (-100%); E6 = Closed (-100%) C7 = /; E7 = 0.05 (-69%) C8 = Closed (-100%); E8 = 0.09 (-67%) C9 = 0.06 (-95%); E9 = Closed (-100%) C1…	Yes	Of the 10 experimental group participants, nine (90%) experienced a reduction in wound size of 26% to 100% over the 12-week course of the data collection regardless of exercise frequency. The difference in percent wound reduction between the two groups was not statistically significant (Mann-Whitney U test, one tailed, P = .696). The mean Dartmouth and LEAP scores also were not significantly diff…	Descriptive statistics (mean, median, and standard deviation) used to analyze the data and compare patient demographic variables and functional testing out- comes. Frequency distributions were used to describe patient gender, Lower Extremity Amputation Prevention (LEAP) scores, swab results (number of pathogens), participant co- morbidities, and history of using alternative therapies. Mann Whitne…	Intention to treat	Baseline variation in characteristics inlcuding age, gender distribution, comorbidities and wound culture. Other variables not included, which may impact on healing outcomes: duration.type of DM, HbA1c, BMI, wound duration, diet and lifestyle. Inconclusive Study	Nil reported	2. Subjects randomly allocated to groups (0) 3. Allocation was concealed - Unsure (0) 4. Groups were similar at baseline regarding the most important prognostic indicators (0) 5. There was blinding of all subjects (0) 6. There was blinding of all therapists who administered the therapy (0) 7. There was blinding of all assessors who measured at least one key measure (0) 8. Measures of at least one…	Inconclusive Study Need to enrol more patients and provide more exercise guidance
12/10/19	2	Eraydin, S Avsar, Gulcin	The Effect of Foot Exercises on Wound Healing in Type 2 Diabetic Patients With a Foot Ulcer: A Randomized Control Study	Journal of Wound, Ostomy and Continence Nursing	2018/45/123-130	Turkey	Nursing Department Faculty of Health Sciences Gaziosmanpasa University Tokat, Turkey	Investigate the effect of foot exercises on wound healing in type 2 diabetic patients with a diabetic foot ulcer	RCT/Intervention Study	Patients who had been hospitalised, subsequently discharged and diagnosed with DFU	Home	Non-weight bearing foot exercises to be completed seated including: plantar flexion, dorsiflexion, inversion, eversion, circumduction and plantar and dorsiflexion of toes - 18 in total. Exercises to be completed standing once wounds healed	10 repeats twice daily	Usual/routine care	12 weeks	Patients taught foot exercises over 20-30mins in clinical setting by researcher. Provided with pictures of exercise intervention to support education. Patient to record exercise frequency in exercise log.	Gender: Female - Study (15) Male - Study (15) Marital Status: Married - Study (25) Single - Study (5) Education Level: Uneducated - Study (11) Primary School - Study (11) Middle School & Above - Study (8) Before foot care information: Informed - Study (15) Uninformed - Study (15) Formation of a wound before Yes - Study (22) No - Study (8) Yearly average of diabetes - Study 16.23 (Min = 2, Max = 3…	Gender: Female - Control (8) Male - Control (22) Marital Status: Married - Control (20) Single - Control (10) Education Level: Uneducated - Control (14) Primary School - Control (12) Middle School & Above - Control (4) Before foot care information: Informed - Control (9) Uninformed - Control (21) Formation of a wound before Yes - Control (20) No - Control (10) Yearly average of diabetes - Control…	33	32	30	30	1 general condition deteriorated, 1 patient went out of the city, 1 patient wanted to leave	1 patient went out of the city, 1 patient was unreachable	Parallel randomisation starting from intervention group, patients prospectively allocated to control and study intervention group	Distrubution of DFU Area Averages (cm2): Beginning: 24.67 (Control) SD 20.70; 12.63 (Study) SD 14.43 Distribution of DFU Total Depth (cm3): Beginning: 0.61 (Control) SD 0.84; 0.56 (Study) SD 0.85 Distribution of Ulcer Related Features at the Beginning Follow-Up of Patients in the Study and Control Groups: Ulcer Classification: Wagner 1: 17 (Control); 19 (Study) Wagner 2: 13 (Control); 11 (Study) …	Not Measured	Distrubution of DFU Area Averages (cm2): 4th Week: 24.75 (Control) SD 20.84; 6.91 (Study) SD 5.44 Distribution of DFU Total Depth (cm3): 4th Week: 0.82 (Control) SD 1.07; 0.42 (Study) SD 0.68	Not Measured	Distrubution of DFU Area Averages (cm2): 8th Week: 20.33 (Control) SD 20.79; 4.30 (Study) SD 4.30 Distribution of DFU Total Depth (cm3): 8th Week: 0.83 (Control) SD 1.21; 0.36 (Study) SD 0.50	Not Measured	Distrubution of DFU Area Averages (cm2): 12th Week: 18.52 (Control) SD 21.49; 3.29 (Study) SD 3.80 Distribution of DFU Total Depth (cm3): 12th Week: 0.80 (Control) SD 1.26; 0.28 (Study) SD 0.38 Distribution of Ulcer Related Features at the Last Week Follow-Up of Patients in the Study and Control Groups: Ulcer Classification: Wagner 1: 16 (Control); 14 (Study) Wagner 2: 13 (Control); 10 (Study) Im…	Yes	Significant differences were found between diabetic foot ulcer sizes in the study intervention group in the 4th and 12th weeks compared to beginning baseline (P ≤ .05). However, only the 12th week was different from the beginning in the control group (P = .000). The mean depths of the ulcers were 0.56 (0.85), 0.42 (0.68), 0.36 (0.50), and 0.28 (0.38) cm in the study intervention group (P < .05) a…	Between groups, independent sample t test and the Mann-Whitney U test, analysis of variance, and the Kruskal-Wallis test were performed. e χ2 and Fisher exact tests were used to perform analysis between categorical vari- ables.	Intention to treat	Baseline difference in characteristics. Study findings suggest regular foot exercises may reduce depth, size and increase in healing time. 1st Follow Up: No change in control group; 50% reduction in intervention group. 2nd Follow Up: Control group experienced difference for the first time; intervention group continue to experience reduction. 3rd Follow Up: Control group continue to experience red…	Nil reported	2. Subjects randomly allocated to groups (1) 3. Allocation was concealed - Unsure (0) 4. Groups were similar at baseline regarding the most important prognostic indicators (0) 5. There was blinding of all subjects (0) 6. There was blinding of all therapists who administered the therapy (0) 7. There was blinding of all assessors who measured at least one key measure (0) 8. Measures of at least one…	Considered part of usual care, not explored. Exercise is effective in wound healing. Suggested that pt perform NWB exericises for 8/52
																										Getting Culture: Yes: 8 (Control); 6 (Study) No: 22 (Control); 24 (Study) Reproduction in Culture: Yes: 7 (Control); 5 (Study) No: 1 (Control); 1 (Study) Using Antibiotics: Yes: 30 (Control); 30 (Study) No: - (Control); - (Study) Wound Debridement: Yes: 7 (Control); 4 (Study) No: 23 (Control); 26 (Study)						Getting Culture: Yes: 2 (Control); - (Study) No: 28 (Control); 30 (Study) Reproduction in Culture: Yes: 1 (Control); - (Study) No: 1 (Control); - (Study) Using Antibiotics: Yes: 2 (Control); - (Study) No: 28 (Control); 30 (Study) Wound Debridement: Yes: 3 (Control); - (Study) No: 27 (Control); 30 (Study)
2019-10-26	3	Nwankwo MJ, Okoye GC, Egwuonwu AV, and Ezeukwu AO	Effect of Twelve Weeks Supervised Aerobic Exercise on Ulcer Healing and Changes in Selected Biochemical Profiles of Diabetic Foot Ulcer Subjects	International Journal of Diabetes Research	2014/3/41-48	Nigeria	Department of Medical Rehabilitation, Nnamdi Azikiwe University, Nnewi Campus, Nigeria 2Department of Medical Rehabilitation, University of Nigeria, Enugu Campus, Nigeria	Investigate aerobic exercise intervention on lower extremity oxygen saturation and wound healing among diabetic subjects, over a 12 weeks course	RCT	T1DM or T2DM attending diabetic clinic of Nnamdi Azikiwe University Teaching Hospital, Nnewi	Exercise Clinic	Exercise under supervision throughout the study, rode on a bicycle ergo meter with foot interaction kept constant with standard gym pedal and specialised offloading insole padding to relieve pressure on the ulcer.	3 times/week at exercise clinic - 5 mins warm up. Start with 10 mins exercise, which is increased until exercise intensity gets to the target heart rate of perceived exertion (RPE). Subjects were encouraged to increase their exercise time by 5 mins each 2 weeks until they reach 50 mins at the 9th week, which was maintained until the end of the 12 weeks program.	Usual care	12 weeks	Exercise under supervision at exercise clinic	Age: X +/- SD 69.06 +/- 4.79 Duration of Diabetes: 21.77 +/- 7.77 BMI (Kg/m2): 27.66 +/- 5.44	Age: X +/- SD 68.50 +/- 5.01 Duration of Diabetes: 18.73 +/- 7.16 BMI (Kg/m2): 22.96 +/- 3.23	31	30	0	0	0	N/A	Pitcher bowl method	Baseline Wound Size Area: 17.70 +/- 7.23 SD (C); 26.45 +/- 9.46 SD (S)	Baseline Wound Size Area: 16.17 +/- 7.15 SD (C); 21.23 +/- 8.05 SD (S) Comparison of Percentage Wound Size Reduction: 9.58 +/- 7.03 SD (C); 19.36 +/-9.81 SD (S)	Baseline Wound Size Area: 15.17 +/- 6.57 SD (C); 13.94 +/- 6.59 SD (S) Comparison of Percentage Wound Size Reduction: 14.89 +/- 9.84 SD (C); 49.07 +/- 12.66 SD (S)	Baseline Wound Size Area: 13.53 +/- 6.02 SD (C); 9.42 +/- 6.62 SD (S) Comparison of Percentage Wound Size Reduction: 23.44 +/- 11.51 SD (C); 67.30 +/- 18.47 SD (S)	Baseline Wound Size Area: 11.80 +/- 5.38 SD (C); 6.10 +/- 5.95 SD (S) Comparison of Percentage Wound Size Reduction: 33.78 +/- 12.62 SD (C); 79.49 +/- 16.91 SD (S)	Baseline Wound Size Area: 10.10 +/- 5.09 SD (C); 3.68 +/- 5.00 SD (S) Comparison of Percentage Wound Size Reduction: 42.54 +/- 17.30 SD (C); 87.96 +/- 14.41 SD (S)	Baseline Wound Size Area: 7.93 +/- 4.08 SD (C); 1.97 +/- 4.17 SD (S) Comparison of Percentage Wound Size Reduction: 54.76 +/- 17.19 SD (C); 94.08 +/- 18.50 SD (S)	Yes	The baseline wound size area were 26.45 ± 9.46 and 17.70 ± 7.23 for experimental and non-experimental respectively while the wound size area at the end of the 12weeks study were 1.97 ± 4.17 for the experimental group and 7.93 ± 4.08 for non-experimental group and a p-value of 0.001** which showed there was a significant difference in wound size area between the two groups. The results showed that…	Descriptive statistics of mean and standard deviation for all variables. Presented using table and bar chart. Inferential statistics of dependant and independent t-tests were used to explore differences in mean between two groups. Pearson's moment correlations used to determine relationship between two groups and variables of the experimental group.	Intention to treat	Aerobic exercise was found to significantly increase wound size area and percentage wound size reduction in the experimental group at the end of the twelve weeks intervention. The wound size area at fourth week significantly correlated with the percentage wound size reduction, which also supports the fact that wound healing, was greatest at the fourth week of the aerobic exercise intervention in …	Nil reported	2. Subjects randomly allocated to groups (1) 3. Allocation was concealed - Unsure (1) 4. Groups were similar at baseline regarding the most important prognostic indicators (0) 5. There was blinding of all subjects (0) 6. There was blinding of all therapists who administered the therapy (0) 7. There was blinding of all assessors who measured at least one key measure (0) 8. Measures of at least one…	Exercise effective in wound healing

## Sheet: Summary Input 
Journal	Participants (n)	Control (n)	Intervention	Baseline Measurement	Measurement After 4 Weeks	Measurements After 8 Weeks	Measurement After 12 Weeks	Comment
Eraydin, S Avsar, Gulcin	30	30	Patients taught foot exercises over 20-30mins in clinical setting by researcher. Provided with pictures of exercise intervention to support education	Distrubution of DFU Area Averages (cm2): Beginning: 24.67 (Control) SD 20.70; 12.63 (Study) SD 14.43 Distribution of DFU Total Depth (cm3): Beginning: 0.61 (Control) SD 0.84; 0.56 (Study) SD 0.85	Distrubution of DFU Area Averages (cm2): 4th Week: 24.75 (Control) SD 20.84; 6.91 (Study) SD 5.44 Distribution of DFU Total Depth (cm3): 4th Week: 0.82 (Control) SD 1.07; 0.42 (Study) SD 0.68	Distrubution of DFU Area Averages (cm2): 8th Week: 20.33 (Control) SD 20.79; 4.30 (Study) SD 4.30 Distribution of DFU Total Depth (cm3): 8th Week: 0.83 (Control) SD 1.21; 0.36 (Study) SD 0.50	Distrubution of DFU Area Averages (cm2): 12th Week: 18.52 (Control) SD 21.49; 3.29 (Study) SD 3.80 Distribution of DFU Total Depth (cm3): 12th Week: 0.80 (Control) SD 1.26; 0.28 (Study) SD 0.38
Flahr, D	9	8	Non-weight-bearing foot exercises, included simple ankle in-version, eversion, flexion, and extension were prescribed - 4 in total.	Wound Measurement Data (Measured in cm2): C1 = 0.63; E1 = 1.84 C2 = 0.43; E2 = 6.22 C3 = 1.26; E3 = 0.27 C4 = 0.25; E4 = 0.16 C5 = 6.03; E5 = 0.16 C6 = 0.14; E6 = 0.09 C7 = 0.16; E7 = 0.16 C8 = 10.2; E8 = 0.27 C9 = 1.32; E9 = 0.31 C10 = / ; E10 = 1.01	Wound Measurement Data (Measured in cm2): C1 = 0.79; E1 = 1.26 C2 = 0.75; E2 = 2.53 C3 = 0.39; E3 = 0.33 C4 = 0.19; E4 = 0.05 C5 = 5.42; E5 = 0.22 C6 = 0.07; E6 = 0.13 C7 = Withdrew; E7 = 0.06 C8 = Not seen; E8 = 0.24 C9 = 0.71; E9 = 0.31 C10 = / ; E10 = 5.89	Wound Measurement Data (Measured in cm2): C1 = 0.38; E1 = 0.38 C2 = 0.59; E2 = Withdrew (TCC) C3 = 0.16; E3 = 0.24 C4 = 0.05; E4 = 0.07 C5 = 8.10; E5 = 0.27 C6 = Closed; E6 = Closed C7 = /; E7 = 1.32 C8 = 0.42; E8 = 0.31 C9 = Not Seen; E9 = Closed C10 = / ; E10 = 3.06	C1 = 0.79 (+25%); E1 = 0.22 (-88%) C2 = 0.49 (+14%); E2 = / (-59%) C3 = 0.14 (-88%%); E3 = 0.09 (-67%) C4 = Closed (-100%); E4 = Closed (-100%) C5 = 9.18 (+2%); E5 = 0.12 (-25%) C6 = Closed (-100%); E6 = Closed (-100%) C7 = /; E7 = 0.05 (-69%) C8 = Closed (-100%); E8 = 0.09 (-67%) C9 = 0.06 (-95%); E9 = Closed (-100%) C10 = / ; E10 = 2.36 (-131%)	Did not measure depth of wounds. Unable to obtain SD from raw data - Author not responding. Did not calculate DFU averages
Nwankwo MJ, Okoye GC, Egwuonwu AV, and Ezeukwu AO	31	30	Exercise under supervision throughout the study, rode on a bicycle ergo meter with foot interaction kept constant with standard gym pedal and specialised offloading insole padding to relieve pressure on the ulcer.	Baseline Wound Size Area: 16.17 +/- 7.15 SD (C); 21.23 +/- 8.05 SD (S)	Baseline Wound Size Area: 15.17 +/- 6.57 SD (C); 13.94 +/- 6.59 SD (S)	Baseline Wound Size Area: 11.80 +/- 5.38 SD (C); 6.10 +/- 5.95 SD (S)	Baseline Wound Size Area: 7.93 +/- 4.08 SD (C); 1.97 +/- 4.17 SD (S)	Intervention unlike 1 and 2, cannot perform meta-analysis with this
